# Supplementary material
Source: Research Square preprint supplement (doi:10.21203/rs.3.rs-9461509/v1)
Supplement: Supplementary file 2 [file Supplementary table1.pdf › Supplementary table1.pdf]

**Table1 Clinical Score Parameters for radiation induced sickness. Mice**

|                                                                                                                                  |                                                                                                                                                                                                                                                                                                     |
|----------------------------------------------------------------------------------------------------------------------------------|-----------------------------------------------------------------------------------------------------------------------------------------------------------------------------------------------------------------------------------------------------------------------------------------------------|
| Assess the following parameters and tally with associated scoring system:                                                        |                                                                                                                                                                                                                                                                                                     |
| A. Physical appearance                                                                                                           | 0 – normal<br>1 – lack of grooming<br>2 – rough hair coat<br>3 – very rough hair coat<br>4 – Eye discharge covering the eyeball                                                                                                                                                                     |
| B. Posture                                                                                                                       | 0 – normal<br>1 – sitting in hunched position<br>4 – hunched posture, head resting on floor<br>6 – lying prone on cage floor/unable to maintain upright posture<br>(**suggests moribund and euthanasia required)                                                                                    |
| C. Activity/Behavior                                                                                                             | 0 – normal<br>1 – minor changes in behavior<br>3 – above plus change in respiratory rate or effort<br>6 – moves only when stimulated                                                                                                                                                                |
| D. Food intake                                                                                                                   | 0 – normal<br>1 – moderately reduced<br>2 – not eating since last check point<br>(**assumes multiple checks per day, by visual inspection of food on floor of cage)<br>3 – not eating for last 2 check points<br>(**assumes multiple checks per day, by visual inspection of food on floor of cage) |
| E. Water intake                                                                                                                  | 0 – normal<br>1 – mildly reduced<br>2 – moderately reduced<br>3 – severely reduced<br>(**with supplemental fluids given by s.c.)                                                                                                                                                                    |
| F. Feces                                                                                                                         | 0 – normal<br>1 – mildly reduced<br>2 – moderately reduced<br>3 – severely reduced                                                                                                                                                                                                                  |
| G. Body Weight (assessed weekly, then every other day when 10% weight change reached, and daily after 15% weight change reached) | 0 – normal (<5% change from initial weight)<br>1 – 5-10% weight change<br>2 – 10-14.9% weight change<br>3 – 15-19.9% weight change<br>4 – 20-24.9% weight change<br>6 – > 25% weight change                                                                                                         |
| H. Body temperature (ventral surface temp. determined using infrared thermometer)                                                | 0 – 33-35 °C<br>2 – 30-32.9 °C<br>4 – 28-29.9 °C<br>6 – < 28 °C                                                                                                                                                                                                                                     |
| Endpoint for euthanasia: any single parameter of 6 or combined score for parameters A to H => 15.                                |                                                                                                                                                                                                                                                                                                     |
| Immediate endpoints for euthanasia:                                                                                              |                                                                                                                                                                                                                                                                                                     |
| 1. Unconsciousness<br>2. Inability to remain upright<br>3. Agonal respiration (i.e. gasping)<br>4. Convulsions                   |                                                                                                                                                                                                                                                                                                     |

#### NMR

|                                                                                                                                  |                                                                                                                                                                                                                                                                                                     |
|----------------------------------------------------------------------------------------------------------------------------------|-----------------------------------------------------------------------------------------------------------------------------------------------------------------------------------------------------------------------------------------------------------------------------------------------------|
| Assess the following parameters and tally with associated scoring system:                                                        |                                                                                                                                                                                                                                                                                                     |
| A. Physical appearance                                                                                                           | 0 –normal<br>1 – lack of grooming<br>2 – rough skin<br>3 – very rough skin                                                                                                                                                                                                                          |
| B. Posture                                                                                                                       | 0 – normal<br>1 – sitting in hunched position<br>4 – hunched posture, head resting on floor<br>6 – Lie on the cage floor with feet facing up<br>(**suggests moribund and euthanasia required)                                                                                                       |
| C. Activity/Behavior                                                                                                             | 0 – normal<br>1 – minor changes in behavior<br>3 – above plus change in respiratory rate or effort<br>6 – moves only when stimulated                                                                                                                                                                |
| D. Food intake                                                                                                                   | 0 – normal<br>1 – moderately reduced<br>2 – not eating since last check point<br>(**assumes multiple checks per day, by visual inspection of food on floor of cage)<br>3 – not eating for last 2 check points<br>(**assumes multiple checks per day, by visual inspection of food on floor of cage) |
| E. Water intake (Calculated based on root vegetables intake)                                                                     | 0 – normal<br>1 – mildly reduced (reduced 10%)<br>2 – moderately reduced (reduced 25%)<br>3 – severely reduced (reduced 33%)<br>(**with supplemental fluids given by s.c.)                                                                                                                          |
| F. Feces                                                                                                                         | 0 – normal<br>1 – mildly reduced<br>2 – moderately reduced<br>3 – severely reduced                                                                                                                                                                                                                  |
| G. Body Weight (assessed weekly, then every other day when 10% weight change reached, and daily after 15% weight change reached) | 0 – normal (<5% change from initial weight)<br>1 – 5-10% weight change<br>2 – 10-14.9% weight change<br>3 – 15-19.9% weight change<br>4 – 20-24.9% weight change<br>6 – > 25% weight change                                                                                                         |
| H. Body temperature (ventral surface temp. determined using infrared thermometer)                                                | 0 – 30-33 °C<br>2 – 30-32.9 °C<br>4 – 28-29.9 °C<br>6 – < 28 °C                                                                                                                                                                                                                                     |
| Endpoint for euthanasia: any single parameter of 6 or combined score for parameters A to G => 15.                                |                                                                                                                                                                                                                                                                                                     |
| Immediate endpoints for euthanasia:                                                                                              |                                                                                                                                                                                                                                                                                                     |
| 1. Unconsciousness<br>2. Inability to remain upright<br>3. Agonal respiration (i.e. gasping)<br>4. Convulsions                   |                                                                                                                                                                                                                                                                                                     |
