# Supplementary material
Source: Research Square preprint supplement (doi:10.21203/rs.3.rs-9461509/v1)
Supplement: Supplementary file 3 [file Supplementary table2.pdf › Supplementary table2.pdf]

**Table2**    gene list

GBP6  
IL8  
CFD  
Hp  
OLFM4  
MMP8  
IL1R2  
UBE2C  
PLA2G7  
MPO  
ACOD1  
AHSP  
KEL  
PRDX2  
CD3E  
C1QC  
C1QA  
S100A4  
MS4A1  
CD22  
CD79A  
LYZ  
HBA2  
PRG3  
LGALS1  
GPR56  
JCHAIN  
TOP2A  
CXCL12  
VCAM1
