# Supplementary material
Source: Research Square preprint supplement (doi:10.21203/rs.3.rs-9461509/v1)
Supplement: Supplementary file 4 [file Supplementary table3.pdf › Supplementary table3.pdf]

**Table 3**

|                                                 | <b>Marker</b>         |
|-------------------------------------------------|-----------------------|
| Monocyte                                        | CD14                  |
| hematopoietic stem and progenitor cells (HSPCs) | CD34 and Thy1.1       |
| B cell                                          | CD19                  |
| macrophage                                      | CD14, TLR2 and TLR4   |
| pre pro B cell                                  | CD19 and CD45         |
| T cell                                          | CD3                   |
| neutrophil                                      | CXCR4, MMP9, and CD44 |
| neutrophil progenitor                           | CD38                  |
