# Supplementary material
Source: Research Square preprint supplement (doi:10.21203/rs.3.rs-9461509/v1)
Supplement: Supplementary file 5 [file Supplementary table4.pdf › Supplementary table4.pdf]

### effect sizes with confidence intervals

#### CFU-GEMM

Tukey's multiple co 95.00% CI of dii Adjusted P Value  
NMR HSPC vs. Irrac -7.046 to -2.28 <0.0001  
C19 vs. Irradiation+ -5.712 to -0.95 3.40E-03  
C24 vs. Irradiation+ -5.046 to -0.28 2.25E-02  
Mouse HSPC vs. Irr 0.6209 to 5.379 8.80E-03  
Irradiation+NMR H 2.954 to 7.712 <0.0001  
Irradiation+C19 vs. 2.288 to 7.046 <0.0001  
Irradiation+C24 vs. 0.9542 to 5.712 3.40E-03  
NMR HSPC vs. Mol -23.26 to -6.73 2.00E-04

#### CFU-GM

Tukey's multiple co 95.00% CI of dii Adjusted P Value  
NMR HSPC vs. Irrac 1.405 to 17.93 0.0162  
C19 vs. Irradiation+ 2.072 to 18.60 0.0094  
C24 vs. Irradiation+ -6.262 to 10.26 9.88E-01  
Mouse HSPC vs. Irr 14.74 to 31.26 <0.0001

#### BFU-E Tukey's multiple co 95.00% CI of dii Adjusted P Value

NMR HSPC vs. Irrac -12.78 to -5.21 <0.0001  
NMR HSPC vs. Mol -7.784 to -0.21 3.44E-02  
Irradiation+NMR H 7.883 to 15.45 <0.0001  
C19 vs. Irradiation+ -10.12 to -2.55 0.0006  
Irradiation+C24 vs. 8.883 to 16.45 <0.0001
