# Supplementary material
Source: Research Square preprint supplement (doi:10.21203/rs.3.rs-9461509/v1)
Supplement: Supplementary file 6 [file Supplementary table5.pdf › Supplementary table5.pdf]

| status | family    | pval        | qval        | gene_short | use_for_or | gene     |
|--------|-----------|-------------|-------------|------------|------------|----------|
| OK     | negbinomi | 1.15E-34    | 1.03E-33    | ENSHGLGC   | FALSE      | CCNL1    |
| OK     | negbinomi | 9.25E-61    | 1.53E-59    | ENSHGLGC   | FALSE      | ZDHHHC3  |
| OK     | negbinomi | 5.63E-26    | 3.62E-25    | ENSHGLGC   | FALSE      | CDO1     |
| OK     | negbinomi | 1.78E-60    | 2.93E-59    | ENSHGLGC   | FALSE      | UNC5A    |
| OK     | negbinomi | 3.84E-98    | 1.07E-96    | ENSHGLGC   | TRUE       | CDC42SE2 |
| OK     | negbinomi | 6.20E-50    | 8.14E-49    | ENSHGLGC   | FALSE      | MYC      |
| OK     | negbinomi | 0           | 0           | ENSHGLGC   | FALSE      | PGAM1    |
| OK     | negbinomi | 5.93E-07    | 1.43E-06    | ENSHGLGC   | FALSE      | ATP5F1E  |
| OK     | negbinomi | 2.13E-45    | 2.54E-44    | ENSHGLGC   | FALSE      | RPS23    |
| OK     | negbinomi | 3.46E-115   | 1.19E-113   | ENSHGLGC   | FALSE      | EPB41L4A |
| OK     | negbinomi | 1.50E-271   | 1.40E-269   | ENSHGLGC   | FALSE      | ITM2B    |
| OK     | negbinomi | 0.11118372  | 0.159476792 | ENSHGLGC   | FALSE      | PAXBP1   |
| OK     | negbinomi | 2.33E-124   | 8.87E-123   | ENSHGLGC   | FALSE      | CSTB     |
| OK     | negbinomi | 0.467655391 | 0.582497136 | ENSHGLGC   | TRUE       | PDCD6    |
| OK     | negbinomi | 0           | 0           | ENSHGLGC   | FALSE      | HSP90B1  |
| OK     | negbinomi | 7.18E-34    | 6.26E-33    | ENSHGLGC   | TRUE       | TMED2    |
| OK     | negbinomi | 1.40E-31    | 1.13E-30    | ENSHGLGC   | FALSE      | SUB1     |
| OK     | negbinomi | 0           | 0           | ENSHGLGC   | FALSE      | Clu      |
| OK     | negbinomi | 3.75E-259   | 3.40E-257   | ENSHGLGC   | FALSE      | SSR1     |
| OK     | negbinomi | 0           | 0           | ENSHGLGC   | FALSE      | HSP90AB1 |
| OK     | negbinomi | 4.93E-133   | 2.03E-131   | ENSHGLGC   | FALSE      | PIM1     |
| OK     | negbinomi | 1.32E-37    | 1.29E-36    | ENSHGLGC   | TRUE       | RPS18    |
| OK     | negbinomi | 1.38E-85    | 3.28E-84    | ENSHGLGC   | FALSE      | BPGM     |
| OK     | negbinomi | 0           | 0           | ENSHGLGC   | FALSE      | TP53INP1 |
| OK     | negbinomi | 1.02E-168   | 5.66E-167   | ENSHGLGC   | FALSE      | CD44     |
| OK     | negbinomi | 1.13E-27    | 7.82E-27    | ENSHGLGC   | TRUE       | CPT1A    |
| OK     | negbinomi | 3.31E-120   | 1.19E-118   | ENSHGLGC   | FALSE      | MCL1     |
| OK     | negbinomi | 1.51E-05    | 3.28E-05    | ENSHGLGC   | FALSE      | NDUFA5   |
| OK     | negbinomi | 0           | 0           | ENSHGLGC   | TRUE       | CD3E     |
| OK     | negbinomi | 2.96E-13    | 1.04E-12    | ENSHGLGC   | FALSE      | THY1     |
| OK     | negbinomi | 3.22E-59    | 5.17E-58    | ENSHGLGC   | FALSE      | PPIB     |
| OK     | negbinomi | 6.93E-05    | 0.000143921 | ENSHGLGC   | FALSE      | RPS27L   |
| OK     | negbinomi | 1.00E-271   | 9.47E-270   | ENSHGLGC   | FALSE      | KLF6     |
| OK     | negbinomi | 1.84E-249   | 1.57E-247   | ENSHGLGC   | TRUE       | PDIA4    |
| OK     | negbinomi | 1.31E-81    | 2.94E-80    | ENSHGLGC   | FALSE      | SAMD9    |
| OK     | negbinomi | 0           | 0           | ENSHGLGC   | FALSE      | PGK1     |
| OK     | negbinomi | 6.28E-09    | 1.71E-08    | ENSHGLGC   | FALSE      | LDLR     |
| OK     | negbinomi | 4.36E-16    | 1.77E-15    | ENSHGLGC   | FALSE      | RPS15    |
| OK     | negbinomi | 4.08E-11    | 1.26E-10    | ENSHGLGC   | FALSE      | SH3BGR1  |
| OK     | negbinomi | 2.07E-144   | 9.44E-143   | ENSHGLGC   | FALSE      | 7SK      |
| OK     | negbinomi | 4.74E-120   | 1.71E-118   | ENSHGLGC   | FALSE      | PTMA     |
| OK     | negbinomi | 6.79E-280   | 6.59E-278   | ENSHGLGC   | FALSE      | CD4      |
| OK     | negbinomi | 3.52E-130   | 1.40E-128   | ENSHGLGC   | FALSE      | MMP8     |
| OK     | negbinomi | 0.000335217 | 0.000658887 | ENSHGLGC   | FALSE      | PPM1D    |
| OK     | negbinomi | 0           | 0           | ENSHGLGC   | FALSE      | JCHAIN   |
| OK     | negbinomi | 0           | 0           | ENSHGLGC   | FALSE      | PLAC8    |
| OK     | negbinomi | 2.95E-137   | 1.27E-135   | ENSHGLGC   | FALSE      | RPS4X    |
| OK     | negbinomi | 0           | 0           | ENSHGLGC   | FALSE      | CALR     |
| OK     | negbinomi | 0.000959402 | 0.00180285  | ENSHGLGC   | FALSE      | GATAD2A  |
| OK     | negbinomi | 6.63E-170   | 3.71E-168   | ENSHGLGC   | FALSE      | CSTA     |
| OK     | negbinomi | 1.28E-133   | 5.33E-132   | ENSHGLGC   | FALSE      | RPS19    |
| OK     | negbinomi | 2.60E-15    | 1.01E-14    | ENSHGLGC   | FALSE      | FEN1     |
| OK     | negbinomi | 1.28E-11    | 4.09E-11    | ENSHGLGC   | FALSE      | TMEM258  |
| OK     | negbinomi | 3.516E-130  | 1.3972E-128 | ENSHGLGC   | FALSE      | MMP8     |
| OK     | negbinomi | 2.05572E-84 | 4.79966E-83 | ENSHGLGC   | TRUE       | ITGB2    |
| OK     | negbinomi | 2.5385E-171 | 1.4565E-169 | ENSHGLGC   | TRUE       | CXCR4    |
| OK     | negbinomi | 3.18195E-16 | 1.30334E-15 | ENSHGLGC   | FALSE      | CD14     |

|    |           |             |             |          |       |       |
|----|-----------|-------------|-------------|----------|-------|-------|
| OK | negbinomi | 0           | 0           | ENSHGLGC | FALSE | MPO   |
| OK | negbinomi | 0           | 0           | ENSHGLGC | TRUE  | TOP2A |
| OK | negbinomi | 0           | 0           | ENSHGLGC | FALSE | C1QA  |
| OK | negbinomi | 0           | 0           | ENSHGLGC | FALSE | KEL   |
| OK | negbinomi | 9.30E-160   | 4.86E-158   | ENSHGLGC | FALSE | GPR56 |
| OK | negbinomi | 0           | 0           | ENSHGLGC | FALSE | CD79A |
| OK | negbinomi | 0           | 0           | ENSHGLGC | FALSE | MS4A1 |
| OK | negbinomi | 1.27E-38    | 1.28E-37    | ENSHGLGC | TRUE  | IP6K1 |
| OK | negbinomi | 6.8479E-174 | 3.9949E-172 | ENSHGLGC | TRUE  | IL8   |
