# Supplementary material
Source: Research Square preprint supplement (doi:10.21203/rs.3.rs-9461509/v1)
Supplement: Supplementary file 7 [file Supplementary table6.pdf › Supplementary table6.pdf]

**Table 5**  
**NMR**

| Symbol | forward                     | reverse                     |
|--------|-----------------------------|-----------------------------|
| EPRS   | GCAAGAAGAGGCAACGCAGAG       | TGGCACTGACTGACTGGAAGAC      |
| NFE2L2 | TTTCAGTCTCTTGTTCCCGATATTCC  | CTCCTGCCAAATCTCCTCAATGTC    |
| CSNK1D | GGACCGAGAGGAGCGATTGAG       | TGGAGAGGTGTTAGCCGTGTG       |
| CPOX   | CCGTCGCCCGCTTTGGG           | GCTCGTCCTCTTCCTCCTTCTC      |
| DDIT4  | GCCTGGACTCTCGCCTGTG         | AGCTTCTTCTTGATGACTCTGAAACC  |
| CDKN1A | GCAGGGGATAGTGGCTCAGG        | CTCGGGCGGCTCAGAAGAC         |
| GATA1  | TGGTGGCAGGTGGCAGTG          | GGGAAAGGCATAAGGTGGCTAAC     |
| HMBS   | AAGATTGGAGAGAAGAGCCTATTTACG | AAGCCAGGAGGTAGCACAGTAG      |
| NR3C1  | TCTGCCTGGTGTGCTCTGATG       | TGCTGTCTACCTTCCACTGCTC      |
| CD44   | TCATCATCTTGGCATCGCTCTTG     | TCTGTCCTCCACTGCTCCATTG      |
| CNDP2  | GTATTCTGTGACCTTGACCTTCC     | TCCTTCTATGTAGTTATGCCTGTTGAG |
| SCO1   | TTCCAAGTCTGCCAGATTTAACTCC   | TTGTGCCAGTCAAGCCAATCAG      |
| GAPDH  | TGGAGAAAGCGGCCAAATAC        | AAAGGTGGAAGAGTGGGTG         |

Mice

| Symbol | forward                   | reverse                     |
|--------|---------------------------|-----------------------------|
| EPRS   | TCTGTCCAGGTGGTAGTCATTCC   | GCCGCCTTCTGTACTCATTGC       |
| NFE2L2 | AGTCCTTCCTCTGCTGCCATC     | GTGCCTTCGGTGTGCTTCTG        |
| CSNK1D | ACCAAGAGGCAGAAGTATGAGAGG  | AGGTATGTGGCAAATTCAGAAGGATAG |
| CPOX   | GCGAACCAAATGAGAGGCAGAG    | TGAATCACAGAACTTACACCCATAGC  |
| DDIT4  | CTCTTCCTCTTCGTCCTCGTCTC   | GCCACTGTTGCTGCTGTCC         |
| CDKN1A | CCGTGGACAGTGAGCAGTTG      | CCTCCAGCGGCGTCTCC           |
| GATA1  | TCTACCCTGCCTCAACTGTGTG    | TCAGCCGCTCCGTCTTCAAG        |
| HMBS   | CTGTGGTGGCGATGCTGAAAG     | GGTAAACAGGCTCTTCTCTCCAATC   |
| NR3C1  | TCTGCCTGGTGTGCTCTGATG     | TGCTGTCTACCTTCCACTGCTC      |
| CD44   | CAAGTGCGAACCAGGACAGTG     | AATCAGAGCCAGTGCCAGGAG       |
| CNDP2  | CGCTCTACGACCACATTGACTTC   | GGGACGGGTATCGCCATCTG        |
| SCO1   | GAAGCCATTGCGACTTATGTGAAAG | TGTAGTCTTCATCCTCATCCTTCGG   |
| GAPDH  | GGTTGTCTCCTGCGACTTCA      | TGGTCCAGGGTTTCTTACTCC       |
