# Supplementary material
Source: Research Square preprint supplement (doi:10.21203/rs.3.rs-9461509/v1)
Supplement: Supplementary file 8 [file Supplementary table7.pdf › Supplementary table7.pdf]

**supplemental Table 6**

| Applicati<br>on | Manufacturer       | Antibody                                | Clone           |
|-----------------|--------------------|-----------------------------------------|-----------------|
| mouse           | BioLegend,USA      | FITC anti-mouse CD4                     | RM4-5           |
|                 | BioLegend,USA      | FITC anti-mouse CD8a                    | 53-6.7          |
|                 | BioLegend,USA      | FITC anti-mouse/human CD45R/B220        | RA3-6B2         |
|                 | Proteintech, China | FITC Anti-Mouse CD127 (IL-7Ra) (A7R34)  | A7R34           |
|                 | BioLegend,USA      | FITC anti-mouse TER-119/Erythroid Cells | TER-119         |
|                 | BioLegend,USA      | FITC anti-mouse Ly-6G/Ly-6C (Gr-1)      | RB6-8C5         |
|                 | BioLegend,USA      | PE anti-mouse Ly-6A/E (Sca-1)           | D7              |
|                 | BioLegend,USA      | APC anti-mouse CD117 (c-kit)            | ACK2            |
| NMR             | BioLegend,USA      | APC anti-human CD34                     | 581             |
|                 | BioLegend,USA      | PE anti-rat CD90/mouse CD90.1 (Thy-1.1) | OX-7            |
|                 | BD,USA             | FITC Anti-Mouse CD125                   | T21             |
|                 | BioLegend,USA      | FITC anti-mouse/human CD11b Antibody    | M1/70           |
|                 | Invitrogen,USA     | FITC Anti-Hu/NHP CD18(LFA-1 beta)       | 6.7             |
|                 | Invitrogen,USA     | FITC Anti-Hu CD90(Thy-1)                | eBio5E10 (5E10) |
