# Supplementary material
Source: Research Square preprint supplement (doi:10.21203/rs.3.rs-9461509/v1)
Supplement: Supplementary file 9 [file Supplementary table8.pdf › Supplementary table8.pdf]

### effect sizes with confidence intervals

|          |                                                                 |                  |
|----------|-----------------------------------------------------------------|------------------|
| CFU-GEMM | Tukey's multiple 95.00% CI of diff.                             | Adjusted P Value |
|          | Lv Ctrl vs. Irradiation+Lv Ctrl 4.000 to 12.00                  | 0.0131           |
|          | Irradiation+Lv Ctrl vs. Irradiation+Lv Ctrl -4.643 to -0.02368  | 0.049            |
| CFU-GM   | Tukey's multiple 95.00% CI of diff.                             | Adjusted P Value |
|          | Lv Ctrl vs. Irradiation+Lv Ctrl 1.237 to 47.43                  | 0.0452           |
|          | Irradiation+Lv Ctrl vs. Irradiation+Lv Ctrl -23.58 to -2.416    | 0.0336           |
|          | Irradiation+Lv Ctrl vs. Irradiation+Lv Ctrl -26.66 to -10.01    | 0.0109           |
|          | Irradiation+Lv Ctrl vs. Irradiation+Lv Ctrl -19.44 to -7.223    | 0.0111           |
|          | Irradiation+Lv Ctrl vs. Irradiation+Lv Ctrl -19.98 to -15.36    | <0.0001          |
|          | Irradiation+Lv Ctrl vs. Irradiation+Lv Ctrl -24.66 to -8.006    | 0.0135           |
|          | Irradiation+Lv Ctrl vs. Irradiation+Lv Ctrl -28.00 to -3.999    | 0.0287           |
| BFU-E    | Irradiation+Lv Ctrl vs. Irradiation+Lv Ctrl -20.78 to -8.556    | 0.0092           |
|          | Tukey's multiple 95.00% CI of diff.                             | Adjusted P Value |
|          | Lv Ctrl vs. Irradiation+Lv Ctrl 4.000 to 12.00                  | 0.0131           |
|          | Irradiation vs. Irradiation+Lv Ctrl -9.000 to -0.9996           | 0.0325           |
|          | Irradiation+Lv Ctrl vs. Irradiation+Lv Ctrl -9.000 to -0.9996   | 0.0325           |
|          | Lv Ctrl vs. Lv GATA1 -5.000 to -5.000                           | <0.0001          |
|          | Irradiation+Lv Ctrl vs. Irradiation+Lv Ctrl -13.78 to -1.556    | 0.0323           |
|          | Irradiation+Lv Ctrl vs. Irradiation+Lv Ctrl -9.000 to -0.9996   | 0.0325           |
|          | Irradiation+Lv Ctrl vs. Irradiation+Lv Ctrl -12.95 to -3.714    | 0.0159           |
|          | Irradiation+Lv Ctrl vs. Irradiation+Lv Ctrl -8.976 to -4.357    | 0.0064           |
|          | Irradiation+Lv Ctrl vs. Irradiation+Lv Ctrl -17.99 to -1.339    | 0.0375           |
|          | Irradiation+Lv Ctrl vs. Irradiation+Lv Ctrl -13.29 to -4.047    | 0.0148           |
|          | Irradiation+Lv Ctrl vs. Irradiation+Lv Ctrl -16.66 to -0.005776 | 0.0499           |
