# Supplementary material
Source: Research Square preprint supplement (doi:10.21203/rs.3.rs-9461509/v1)

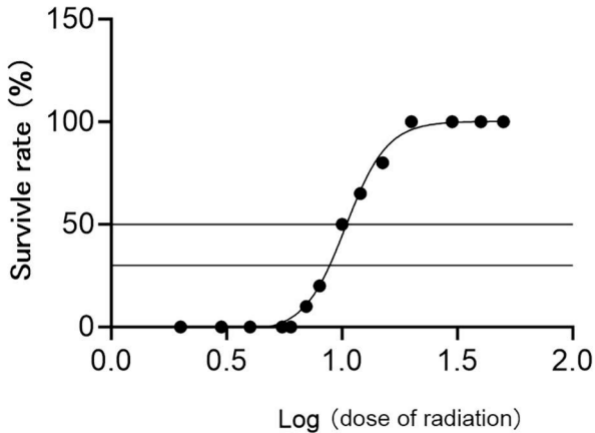

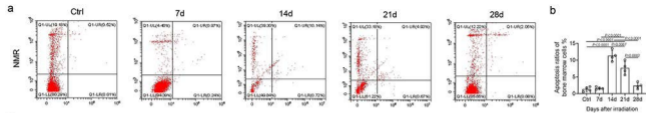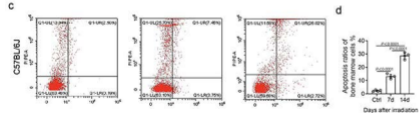

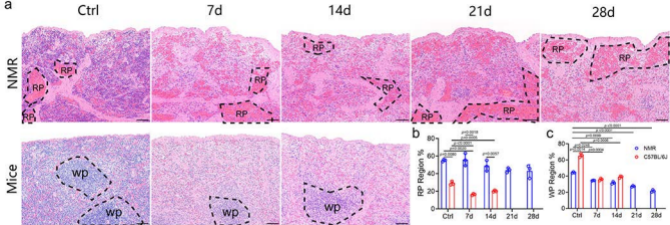

**a**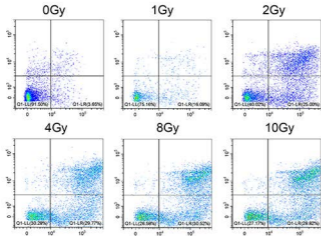**b**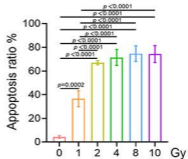

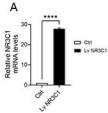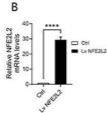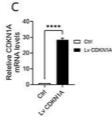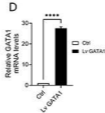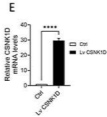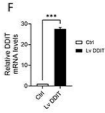

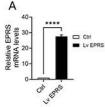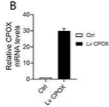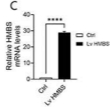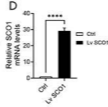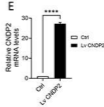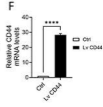

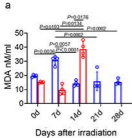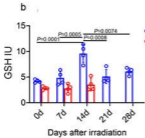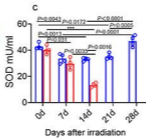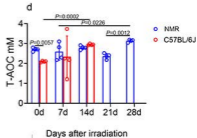

● NMR  
● C57BL/6J

Supplement: Supplementary file 1 [file 0ace138fd0fa3ea17201c227.pdf]
